# Supplementary material for: A flexible hydrogel tactile sensor with low compressive modulus and dynamic piezoresistive response regulated by lignocellulose/graphene aerogels
Source: Royal Society of Chemistry journal article supplement (doi:10.1039/d1tc02762j), 2021-01-01
Supplement: d1tc02762j1.pdf [file d1tc02762j1.pdf]

## Electronic Supporting Information

### **Flexible hydrogel tactile sensor with low compressive modulus and dynamic piezoresistive response regulated by lignocellulose/graphene aerogel**

Hang Zhou<sup>#a</sup>, Li Zheng<sup>#a</sup>, Qingyu Meng<sup>a</sup>, Ruixin Tang<sup>a</sup>, Zhaosong Wang<sup>a</sup>, Baokang Dang<sup>a</sup>, Xiaoping Shen<sup>a\*</sup>, Qingfeng Sun<sup>a\*</sup>

<sup>a</sup>School of Engineering, Zhejiang A&F University, Hangzhou 311300, People's Republic of China

\*Corresponding authors: Xiaoping Shen, E-mail: [xpshen@zafu.edu.cn](mailto:xpshen@zafu.edu.cn); Qingfeng Sun, E-mail: [qfsun@zafu.edu.cn](mailto:qfsun@zafu.edu.cn)

<sup>#</sup> H. Zhou and L. Zheng contributed equally to this work.

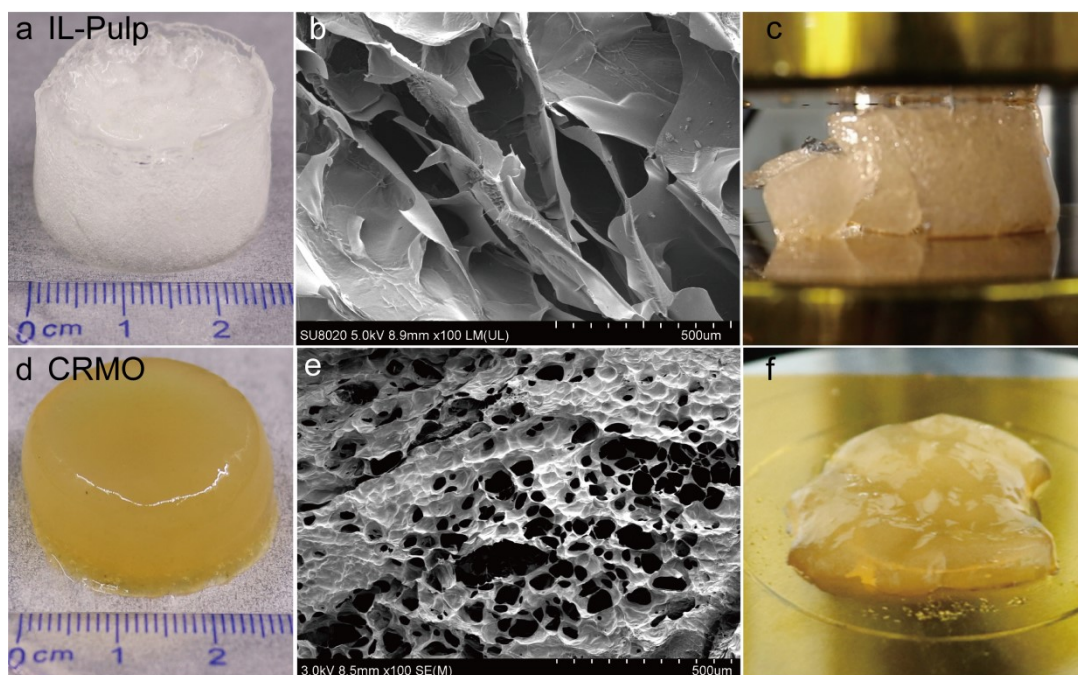

**Fig. S1** The SEM images and the appearance pictures of the hydrogel from ionic liquid (IL)-regenerated pulp (IL-Pulp) and the original CRM hydrogel (CRMO) before and after compression. IL-Pulp was prepared by dissolving pulp in [Bmim]Cl and regenerating in H<sub>2</sub>O.

**Table S1** Determination of component contents (%) of the lignocellulosic hydrogels.

| Component     | Wood | CRM  | CRMO | CRMRH | IL-pulp |
|---------------|------|------|------|-------|---------|
| Cellulose     | 49.2 | 60.8 | 82.8 | 83.1  | 100     |
| hemicellulose | 30.2 | 27.0 | 8.3  | 8.1   | 0       |
| lignin        | 18.3 | 12.2 | 8.9  | 8.8   | 0       |

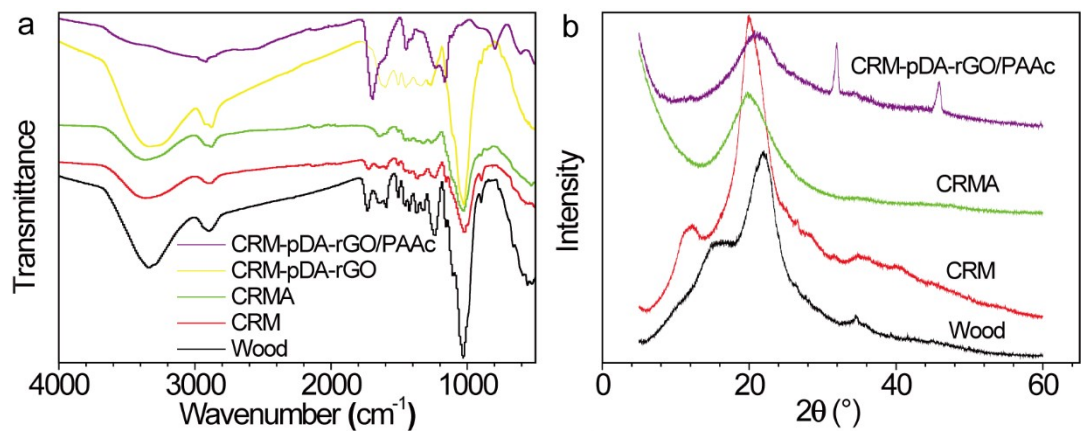

**Fig. S2** (a) FT-IR and (b) XRD of the lignocellulosic hydrogels during the whole processes.

**Table S2** Gradient sensitivity values of the ionic hydrogel sensors.

| Samples          | S1 (MPa <sup>-1</sup> )/Range (MPa) | S2 (MPa <sup>-1</sup> )/Range (MPa) |
|------------------|-------------------------------------|-------------------------------------|
| PAAc             | 1.26/0.047                          | 0.003/0.21                          |
| CRM/PAAc         | 4.18/0.034                          | 0.003/0.57                          |
| CRM-pDA-rGO/PAAc | 9.71/0.022                          | 0.012/0.81                          |

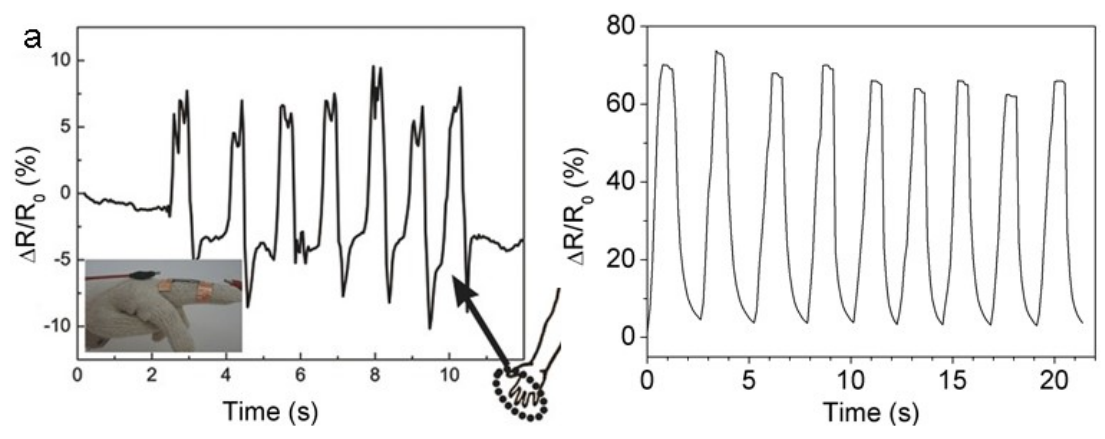

**Fig. S3** Relative resistance changes versus time for the bending and release of the index finger using (a)

nanocarbon-contained hydrogel sensors as reported in literature,<sup>1</sup> or (b) using our hydrogel sensor.

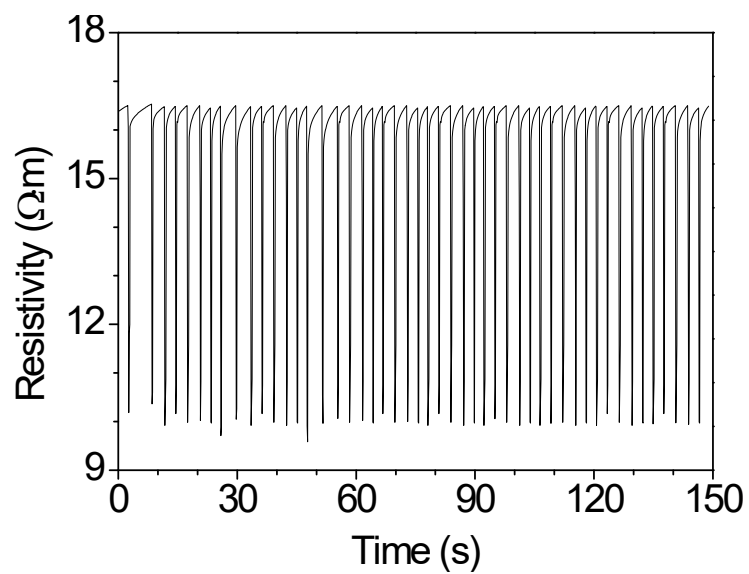

**Fig. S4** Sensing durability of the hydrogel sensor under *ca.* 0.2 MPa stress over 50 cycles.

**Table S3** Comparison of sensitivity and stress ranges of various hydrogel sensors.

| Reference | Type of sensor | Materials                     | Stress range | Sensitivity                                                                             |
|-----------|----------------|-------------------------------|--------------|-----------------------------------------------------------------------------------------|
| 2         | Capacitive     | PAAc/alginate/ACC hydrogel    | 1.0 KPa      | 0.17 KPa <sup>-1</sup>                                                                  |
| 3         | Capacitive     | PAAm-LiCl hydrogel            | 26 KPa       | 0.006 KPa <sup>-1</sup>                                                                 |
| 4         | Capacitive     | PAAm/NaCl hydrogel            | 40 KPa       | 0.009 KPa <sup>-1</sup>                                                                 |
| 5         | Capacitive     | Gelatin DES gel               | 160 KPa      | 0.013 KPa <sup>-1</sup>                                                                 |
| 6         | Capacitive     | AgNWs/Ecoflex                 | 1.2 MPa      | 1.62 MPa <sup>-1</sup><br>(<0.4 MPa)<br>0.57 MPa <sup>-1</sup><br>(<1.2 MPa)            |
| 7         | Piezoresistive | cellulose/graphene composites | 35 MPa       | 0.0013 MPa <sup>-1</sup>                                                                |
| 8         | Piezoresistive | PVA/PAAc/F-MWCNT/PEDOT        | 25 KPa       | 0.011 KPa <sup>-1</sup>                                                                 |
| 9         | Piezoresistive | Carbon aerogel (TMCA)         | 15 KPa       | 0.00131 KPa <sup>-1</sup>                                                               |
| 10        | Piezoresistive | CSM/PAAm/PANI hydrogel        | 6 MPa        | 0.05 KPa <sup>-1</sup><br>(<10 kPa)<br>10 <sup>-5</sup> KPa <sup>-1</sup><br>(>0.5 MPa) |
| 11        | Piezoresistive | PEI/CNT                       | 40 MPa       | 0.05 MPa <sup>-1</sup>                                                                  |

|          |                |                           |         |                         |
|----------|----------------|---------------------------|---------|-------------------------|
| 12       | Piezoresistive | Pt-rGOH aerogel           | 1.8 MPa | 0.3 MPa <sup>-1</sup>   |
| 13       | Piezoresistive | PAniNR@PAN                | 0.3 MPa | 0.95 MPa <sup>-1</sup>  |
|          |                |                           |         | 9.34 MPa <sup>-1</sup>  |
|          |                |                           |         | (<25 KPa)               |
| Our work | Piezoresistive | CRM-pDA-rGO/PAAc hydrogel | 0.8 MPa | 9.71 MPa <sup>-1</sup>  |
|          |                |                           |         | (<0.022 MPa)            |
|          |                |                           |         | 0.012 MPa <sup>-1</sup> |
|          |                |                           |         | (<1.22 MPa)             |

---

**Abbreviations:** polyacrylic acid (PAAc), calcium carbonate (ACC), polyacrylamide (PAAm), deep eutectic solvent (DES), nanowires (NWs), polyvinyl alcohol (PVA), surfactantfunctionalized multi-walled carbon nanotube (F-MWCNT), poly(3,4-ethylenedioxythiophene):polystyrene sulfonate (PEDOT:PSS), TEMPO-oxide cellulose nanofibers (TOCN)-coated-melamine foams (MF) carbon aerogels (TMCA), chitosan microspheres (CSM), polyaniline (PANI), polyethyleneimine (PEI), carbon nanotube (CNT), Pt/reduced graphene oxide hydrogel (Pt-rGOH), polyaniline nanorod on polyacrylonitrile (PAN) nanofiber substrate (PAniNR@PAN)

---

## References

1. G. Cai, J. Wang, K. Qian, J. Chen, S. Li and P. S. Lee, *Adv. Sci.*, 2017, 4, 1600190.
2. Z. Lei, Q. Wang, S. Sun, W. Zhu and P. Wu, *Adv. Mater.*, 2017, 29, 1700321.
3. C. Larson, B. Peele, S. Li, S. Robinson, M. Totaro, L. Beccai, B. Mazzolai and R. Shepherd, *Science*, 2016, 351, 1071-1074.
4. J. Y. Sun, C. Keplinger, G. M. Whitesides and Z. Suo, *Adv. Mater.*, 2014, 26, 7608-7614.
5. H. Qin, R. E. Owyung, S. R. Sonkusale and M. J. Panzer, *J. Mater. Chem. C.*, 2019, 7, 601-608.
6. S. Yao and Y. Zhu, *Nanoscale*, 2014, 6, 2345-2352.
7. Y. Chen, P. Pötschke, J. Pionteck, B. Voit and H. Qi, *J. Mater. Chem. A*, 2018, 6, 7777-7785.

8. G. Ge, W. Yuan, W. Zhao, Y. Lu, Y. Zhang, W. Wang, P. Chen, W. Huang, W. Si and X. Dong, *J. Mater. Chem. A*, 2019, 7, 5949-5956.
9. M. Wang, Y. Chen, Y. Qin, T. Wang, J. Yang and F. Xu, *ACS Sustain. Chem. Eng.*, 2019, 7(15), 12726-12733.
10. J. Duan, X. Liang, J. Guo, K. Zhu and L. Zhang, *Adv. Mater.*, 2016, 28(36), 8037-8044.
11. S. M. Doshi and E. T. Thostenson, *ACS Sens.*, 2018, 3, 1276-1282.
12. S.-H. Hwang, Y.-B. Park, S.-H. Hur and H. G. Chae, *ACS Appl. Nano Mater.*, 2018, 1, 2836-2843.
13. H. H. Shi, N. Khalili, T. Morrison and H. E. Naguib, *ACS Appl. Mater. Interfaces*, 2018, 10, 19037-19046.
